# Supplementary material for: BUB-1 and CENP-C recruit PLK-1 to control chromosome alignment and segregation during meiosis I in C. elegans oocytes
Source: eLife journal article supplement (doi:10.7554/elife.84057), 2023-04-17
Supplement: fig8-data1 [file FIGURE 8-Source data 1.docx]

|  | **total n per meiosis stage** | | |  | **incidence of each phenotype per stage** | | | | |
| --- | --- | --- | --- | --- | --- | --- | --- | --- | --- |
|  |  |  |  |  |  |  |  |  |  |
|  |  |  |  |  |  |  |  |  |  |
| **Figure 8C** | **Metaphase** | **Anaphase** | **PBE** |  | **Metaphase** | | **Anaphase** | | **PBE** |
|  | **Mild** | **Severe** | **Mild** | **Severe** |
| **wild type** | 12 | 12 | 4 |  | 0 | 0 | 0 | 0 | 0 |
| ***hcp-4(RNAi)*** | 6 | 9 | 9 |  | 0 | 0 | 2 | 0 | 0 |
| ***bub-1(RNAi)*** | 17 | 19 | 17 |  | 7 | 8 | 12 | 6 | 4 |
| ***bub-1+hcp-4(RNAi)*** | 12 | 14 | 10 |  | 1 | 10 | 2 | 11 | 7 |
|  |  |  |  |  |  |  |  |  |  |
