# Supplementary material for: BUB-1 and CENP-C recruit PLK-1 to control chromosome alignment and segregation during meiosis I in C. elegans oocytes
Source: eLife. 2023 Apr 17;12:e84057. doi: 10.7554/eLife.84057 (PMC10156168; doi:10.7554/eLife.84057)
Supplement: Figure 1—figure supplement 2—source data 1. [file elife-84057-fig1-figsupp2-data1.xlsx]

## Sheet: Sheet1
				3IB-PP1
			EtOH	10 µM	20 µM	50 µM
	wild type	embryos	350	222	251	157
		live worms	340	220	243	148
		% viability	97	99	97	94
	plk-1(as)	embryos	283	301	274	105
		live worms	277	30	49	0
		% viability	98	10	18	0
				3MB-PP1
			EtOH	10 µM	20 µM	50 µM
	wild type	embryos	229	303	254	111
		live worms	208	273	221	102
		% viability	91	90	87	92
	plk-1(as)	embryos	332	298	300	156
		live worms	309	51	78	22
		% viability	93	17	26	14
				1NA-PP1
			EtOH	10 µM	20 µM	50 µM
	wild type	embryos	326	294	288	175
		live worms	300	253	256	156
		% viability	92	86	89	89
	plk-1(as)	embryos	267	243	185	107
		live worms	243	29	17	9
		% viability	91	12	9	8
