# Supplementary material for: BUB-1 and CENP-C recruit PLK-1 to control chromosome alignment and segregation during meiosis I in C. elegans oocytes
Source: eLife. 2023 Apr 17;12:e84057. doi: 10.7554/eLife.84057 (PMC10156168; doi:10.7554/eLife.84057)
Supplement: Supplementary file 1. — The table details the fluorescent markers and/or mutations, strain name, genotype, and source. [file elife-84057-supp1.xlsx]

## Sheet: Sheet1
PLK-1::sfGFP; mCherry::histone	FGP263	plk-1(lt18[plk-1::sGFP]::loxp)III; ltIs37 [pAA64; pie-1/mCHERRY::his-58; unc-119 (+)]IV	This study
GFP::HCP-4; mCherry::histone; TIR1	FGP311	hcp-4(lt72[GFP::hcp-4])I; ltIs37 [pAA64; pie-1/mCHERRY::his-58; unc-119 (+)]IV)I; ieSi65 [sun-1p::TIR1::sun-1 3’UTR + Cbr-unc-119(+)] II; unc-119(ed3)III	This study
hcp-4(T163A)	FGP669	hcp-4(fgp58[hcp-4(T163A)])I	This study
bub-1(T527A)/hT2	FGP672	bub-1(fgp4[bub-1(T527A)])I; hT2 [bli-4(e937) let-?(q782) qIs48](I;III)	This study
GFP::tubulin; mCherry::histone; bub-1(T527A)/hT2	FGP674	ltSi220[pOD1249/pSW077; Pmex-5::GFP::tbb-2::operon_linker::mCHerry::his-11; cb-unc-119(+)]I; bub-1(fgp4[bub-1(T527A)])I; hT2 [bli-4(e937) let-?(q782) qIs48](I;III)	This study
GFP::tubulin; mCherry::histone; plk-1(as)	FGP675	ltSi220[pOD1249/pSW077; Pmex-5::GFP::tbb-2::operon_linker::mCHerry::his-11; cb-unc-119(+)]I; plk-1((lt106[plk-1 C52V] lt109[plk-1 L115G])III	This study
mScarlet::KNL-3; PLK-1::sGFP	FGP718	knl-3[dha19(mScarlet:: 3XFLAG::knl-3)]V; plk-1(lt18[plk-1::sGFP]::loxp)III.	This study
PLK-1::sGFP; mCherry::histone; hcp-4(T163A)	FGP719	plk-1(lt18[plk-1::sGFP]::loxp)III; ltIs37 [pAA64; pie-1/mCHERRY::his-58; unc-119 (+)]IV; hcp-4(fgp58[hcp-4(T163A)])I	This study
mScarlet::KNL-3; PLK-1::sGFP; hcp-4(T163A)	FGP721	knl-3[dha19(mScarlet:: 3XFLAG::knl-3)]V; plk-1(lt18[plk-1::sGFP]::loxp)III; hcp-4(fgp58[hcp-4(T163A)])I	This study
GFP::ASPM-1; mCherry::histone; plk-1(as)	FGP725	or1935[GFP::aspm-1] I; itIs37[pie-1p::mCherry::H2B::pie-1 3′UTR + unc-119(+)] IV; plk-1((lt106[plk-1 C52V] lt109[plk-1 L115G])III	This study
GFP::tubulin; mCherry::histone; bub-1(wt)	FGP731	ltSi220[pOD1249/pSW077; Pmex-5::GFP::tbb-2::operon_linker::mCHerry::his-11; cb-unc-119(+)]I; unc-119(ed3)III;ltSi268[pOD/pTK013; Pbub-1::Bub1 reencoded; cb-unc-119(+)]II	This study
GFP::tubulin; mCherry::histone; hcp-4(T163A); bub-1(wt)	FGP732	ltSi220[pOD1249/pSW077; Pmex-5::GFP::tbb-2::operon_linker::mCHerry::his-11; cb-unc-119(+)]I; hcp-4(fgp58[hcp-4(T163A)])I; unc-119(ed3)III;ltSi268[pOD/pTK013; Pbub-1::Bub1 reencoded; cb-unc-119(+)]II	This study
GFP::tubulin; mCherry::histone; bub-1(T527A)	FGP733	ltSi220[pOD1249/pSW077; Pmex-5::GFP::tbb-2::operon_linker::mCHerry::his-11; cb-unc-119(+)]I; unc-119(ed3)III;ltSi268[pOD/pTK013; Pbub-1::Bub1 reencoded; cb-unc-119(+)]II	This study
GFP::tubulin; mCherry::histone; hcp-4(T163A); bub-1(T527A)	FGP734	ltSi220[pOD1249/pSW077; Pmex-5::GFP::tbb-2::operon_linker::mCHerry::his-11; cb-unc-119(+)]I; hcp-4(fgp58[hcp-4(T163A)])I; unc-119(ed3)III;ltSi268[pOD/pTK013; Pbub-1::Bub1 reencoded; cb-unc-119(+)]II	This study
PLK-1::sGFP; mCherry::histone; bub-1(wt)	FGP735	plk-1(lt18[plk-1::sGFP]::loxp)III; ltIs37 [pAA64; pie-1/mCHERRY::his-58; unc-119 (+)]IV; unc-119(ed3)III;ltSi268[pOD/pTK013; Pbub-1::Bub1 reencoded; cb-unc-119(+)]II	This study
PLK-1::sGFP; mCherry::histone; hcp-4(T163A); bub-1(wt)	FGP736	plk-1(lt18[plk-1::sGFP]::loxp)III; ltIs37 [pAA64; pie-1/mCHERRY::his-58; unc-119 (+)]IV; hcp-4(fgp58[hcp-4(T163A)])I; unc-119(ed3)III;ltSi268[pOD/pTK013; Pbub-1::Bub1 reencoded; cb-unc-119(+)]II	This study
PLK-1::sGFP; mCherry::histone; bub-1(T527A)	FGP737	plk-1(lt18[plk-1::sGFP]::loxp)III; ltIs37 [pAA64; pie-1/mCHERRY::his-58; unc-119 (+)]IV; unc-119(ed3)III;ltSi1346[pTK070;Pbub-1::BUB-1 T527A reencoded; cb-unc-119(+)]II	This study
PLK-1::sGFP; mCherry::histone; hcp-4(T163A); bub-1(T527A)	FGP738	plk-1(lt18[plk-1::sGFP]::loxp)III; ltIs37 [pAA64; pie-1/mCHERRY::his-58; unc-119 (+)]IV; hcp-4(fgp58[hcp-4(T163A)])I; unc-119(ed3)III;ltSi1346[pTK070;Pbub-1::BUB-1 T527A reencoded; cb-unc-119(+)]II	This study
GFP::tubulin; mCherry::histone	OD868	ltSi220[pOD1249/pSW077; Pmex-5::GFP::tbb-2::operon_linker::mCHerry::his-11; cb-unc-119(+)]I	(Green et al., 2013); PMID: 24217623
bub-1 Mos Chr II	OD991	unc-119(ed3)III;ltSi268[pOD/pTK013; Pbub-1::Bub1 reencoded; cb-unc-119(+)]II	(Houston et al., 2022); doi.org/10.1101/2022.10.07.511323
PLK-1::sfGFP	OD2425	plk-1(lt18[plk-1::sGFP]::loxp)III	(Martino et al., 2017); PMID: 29065307
bub-1(T527A) Mos Chr II	OD2721	unc-119(ed3)III;ltSi1346[pTK070;Pbub-1::BUB-1 T527A reencoded; cb-unc-119(+)]II	(Houston et al., 2022); doi.org/10.1101/2022.10.07.511323
GFP::HCP-4	OD3410	hcp-4(lt72[GFP::hcp-4])I	(Cheerambathur et al., 2019); PMID: 30827898
plk-1(as)	OD3697	plk-1((lt106[plk-1 C52V] lt109[plk-1 L115G])III	(Gómez-Cavazos et al., 2020); PMID: 32619481
GFP::ASPM-1	EU2861	or1935[GFP::aspm-1]I	(Connolly et al., 2015); PMID: 26370499
mScarlet::KNL-3	DKC78	knl-3[dha19(mScarlet::3XFLAG::knl-3)]V	This study
